# Supplementary material for: A New Sugar for an Old Phage: a c-di-GMP-Dependent Polysaccharide Pathway Sensitizes Escherichia coli for Bacteriophage Infection
Source: PubMed Central journal article supplement (PMC8669472; doi:10.1128/mbio.03246-21), 2021-12-14

**NfrA**

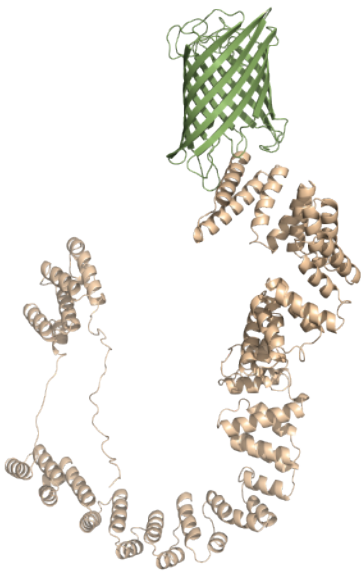

**BcsC**

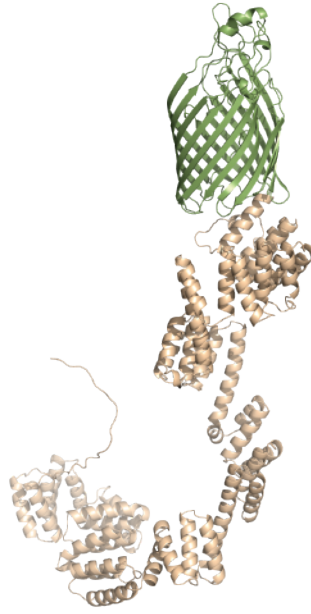

**PgaA**

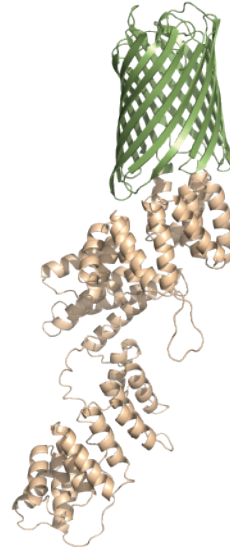

Supplement: mbio.03246-21-sf001.pdf [file mbio.03246-21-sf001.pdf]
