# Supplementary material for: A New Sugar for an Old Phage: a c-di-GMP-Dependent Polysaccharide Pathway Sensitizes Escherichia coli for Bacteriophage Infection
Source: PubMed Central journal article supplement (PMC8669472; doi:10.1128/mbio.03246-21), 2021-12-14

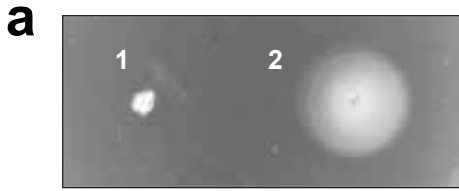

**b**

|                                 | 1 | 2 | 3 | 4 | 5 | 6 | 7 | 8 | 9 |
|---------------------------------|---|---|---|---|---|---|---|---|---|
| IS1 in <i>P<sub>flhDC</sub></i> | - | + | - | + | + | + | - | - | - |
| IS1 in <i>crl</i>               | - | + | + | - | + | - | - | + | - |
| IS1 in <i>dgcJ</i>              | - | + | + | + | - | - | + | - | - |

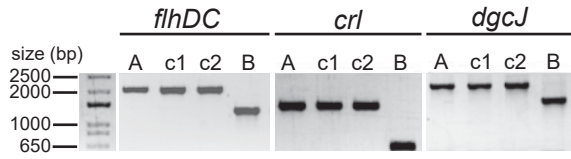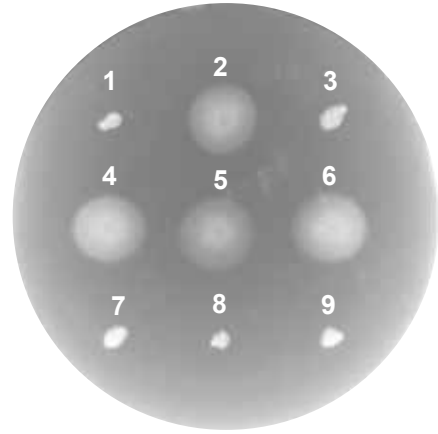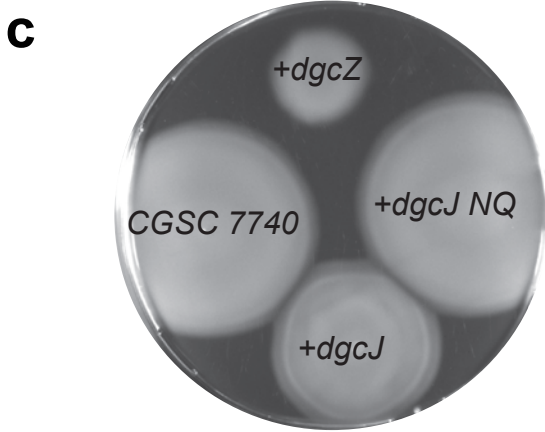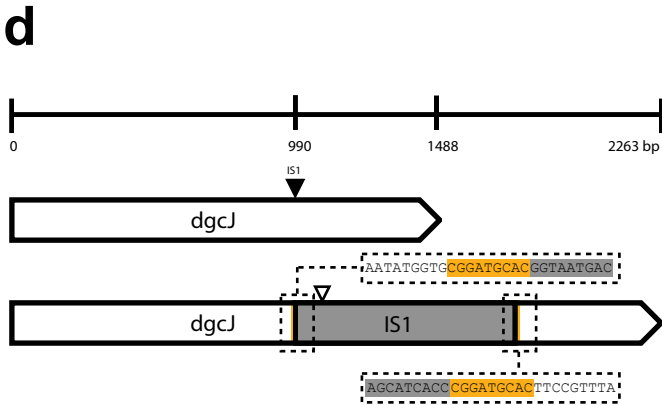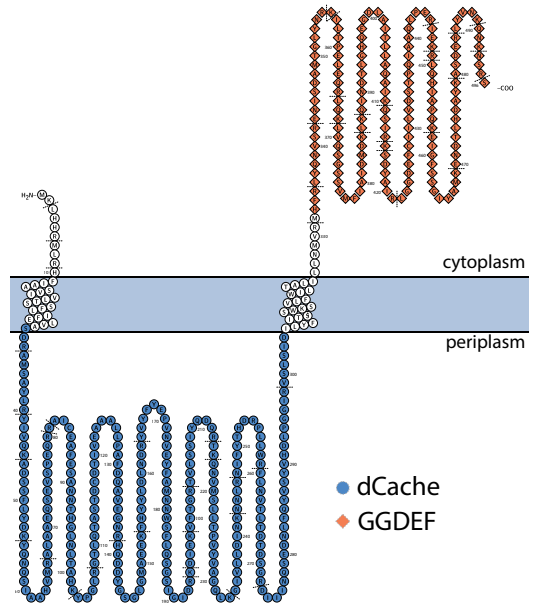

Supplement: mbio.03246-21-sf002.pdf [file mbio.03246-21-sf002.pdf]
